# Supplementary material for: MitoNEET in Perivascular Adipose Tissue Blunts Atherosclerosis under Mild Cold Condition in Mice
Source: PubMed Central journal article supplement (PMC5742148; doi:10.3389/fphys.2017.01032), 2017-12-19

# Suppl. Figure I. *Pgc1*-associated genes and mitoNEET levels in different organs

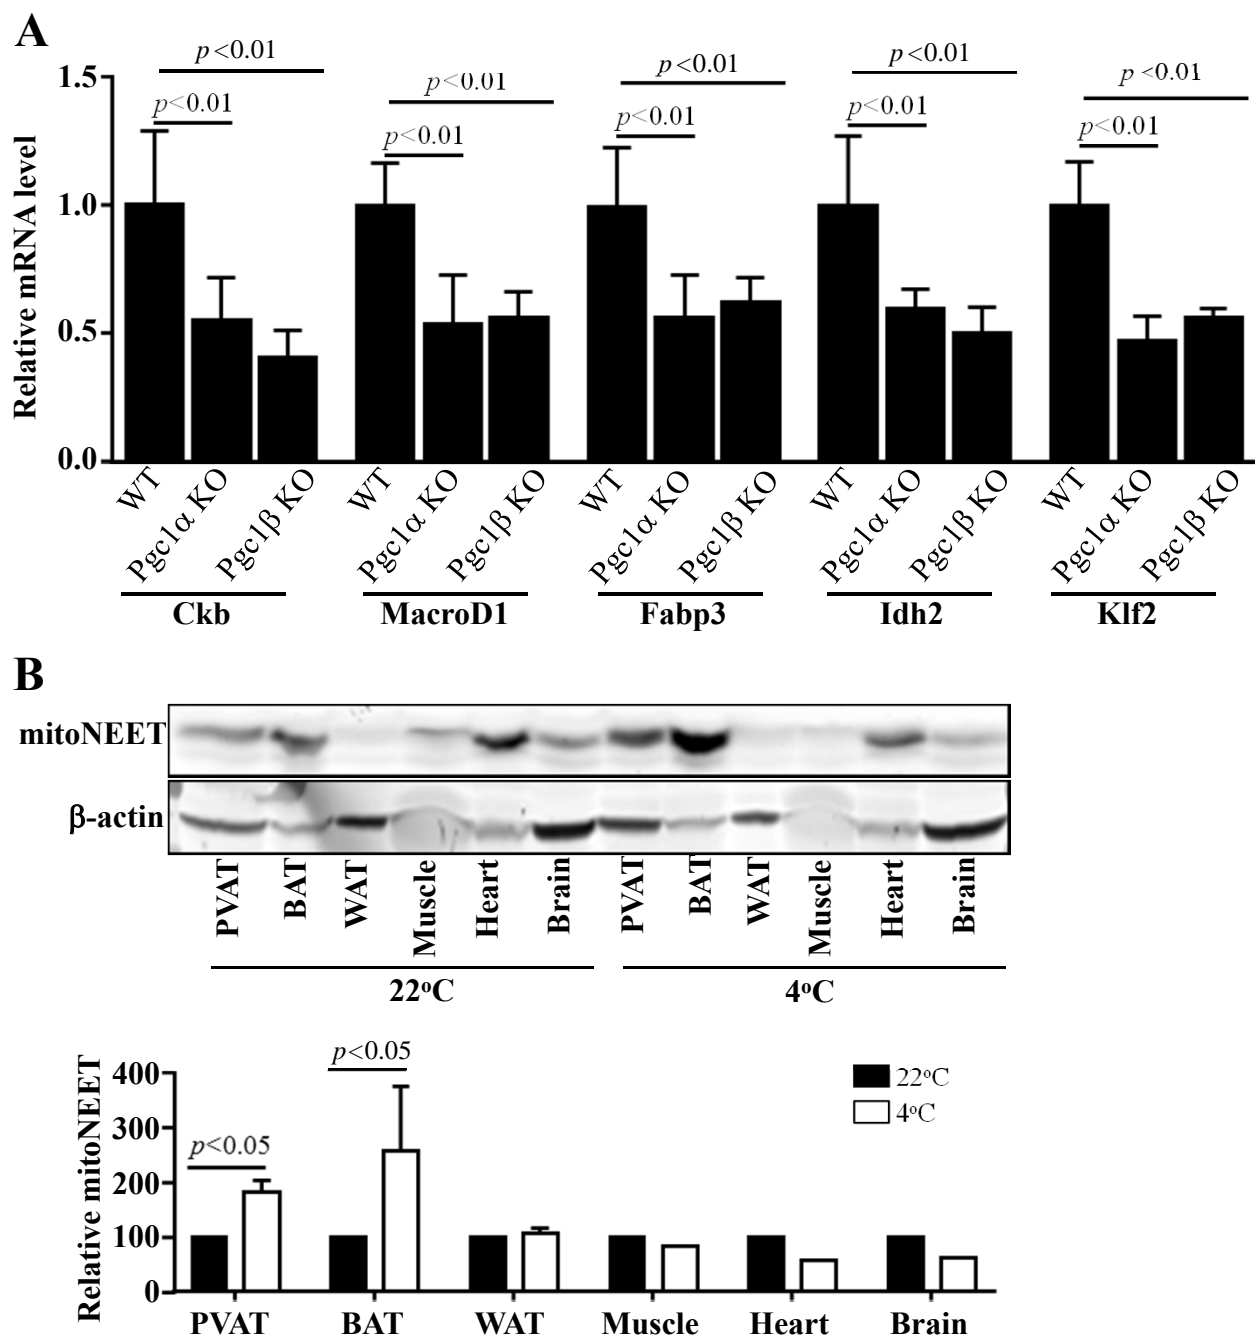

Supplement: Image1.pdf [file Image1.pdf]
