# Supplementary material for: MitoNEET in Perivascular Adipose Tissue Blunts Atherosclerosis under Mild Cold Condition in Mice
Source: PubMed Central journal article supplement (PMC5742148; doi:10.3389/fphys.2017.01032), 2017-12-19

## Suppl. Figure II. brown adipocyte-specific mitoNEET overexpression mice

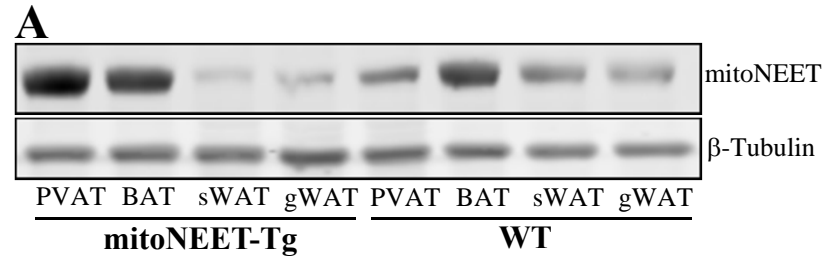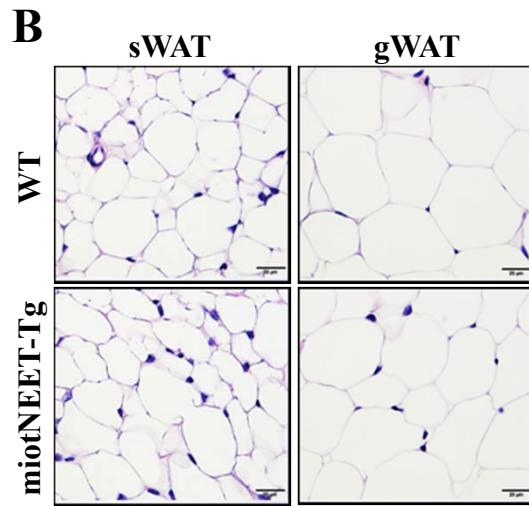

Supplement: Image2.pdf [file Image2.pdf]
