# Supplementary material for: MitoNEET in Perivascular Adipose Tissue Blunts Atherosclerosis under Mild Cold Condition in Mice
Source: PubMed Central journal article supplement (PMC5742148; doi:10.3389/fphys.2017.01032), 2017-12-19

# Suppl. Figure III. Increased in thermogenesis-related genes in gWAT and PVAT of mitoNEET-Tg mice

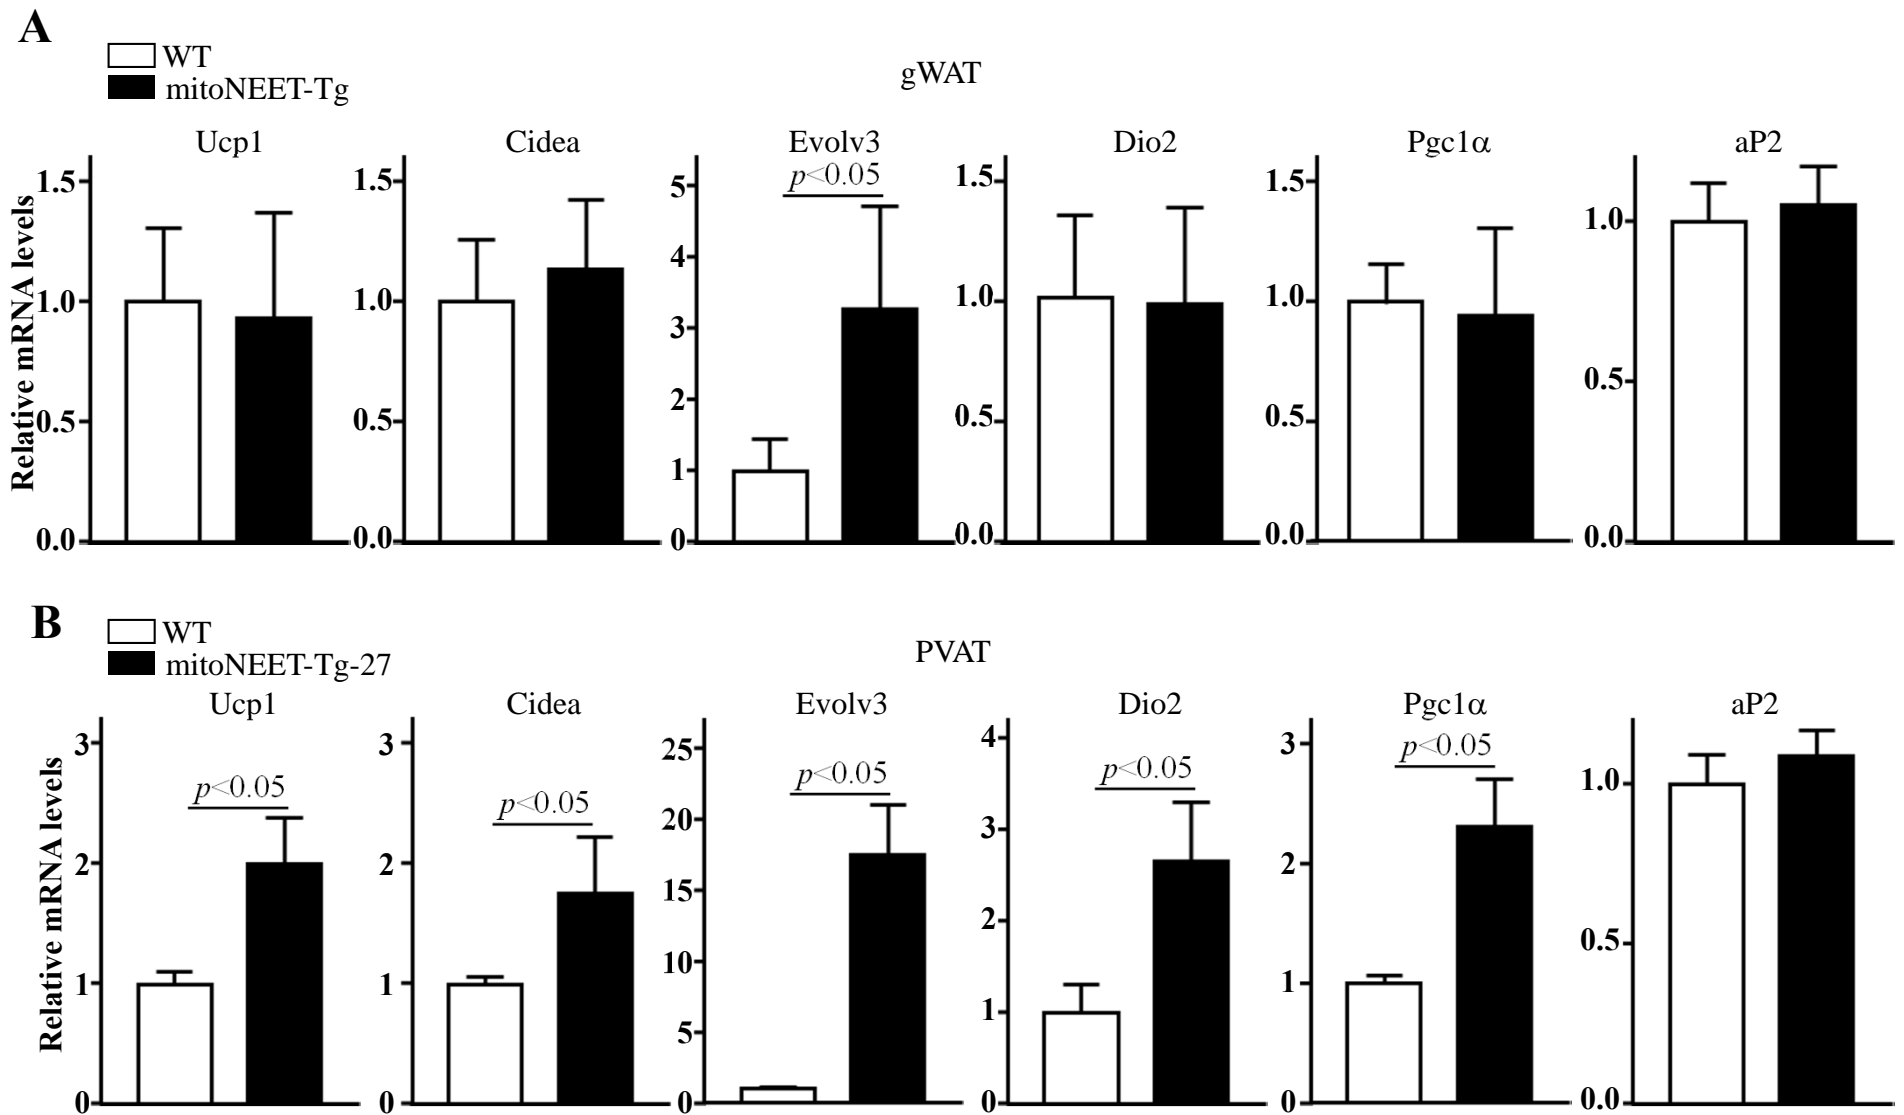

Supplement: Image3.pdf [file Image3.pdf]
